# Supplementary material for: The immune microenvironment shapes transcriptional and genetic heterogeneity in chronic lymphocytic leukemia
Source: PubMed Central journal article supplement — Blood Adv. 2022 Apr 1;7(1):145–58. doi: 10.1182/bloodadvances.2021006941 (PMC9811214; doi:10.1182/bloodadvances.2021006941), 2022-04-01
Supplement: BLOODA_ADV-2021-006941-mmc1.pdf [file BLOODA_ADV-2021-006941-mmc1.pdf]

## Supplemental Data

### **The Immune Microenvironment Shapes Transcriptional and Genetic Heterogeneity in Chronic Lymphocytic Leukemia**

Clare Sun, Yun-Ching Chen, Aina Zurita Martinez, Maria Joao Baptista, Stefania Pittaluga, DeLong Liu, PhD, Daniel Rosebrock, Satyen Harish Gohil, Nakhle S. Saba, Theresa Davies-Hill, Sarah E. M. Herman, Gad Getz, Mehdi Pirooznia, Catherine J. Wu, Adrian Wiestner

## Table of Contents

|                               |    |
|-------------------------------|----|
| Supplemental Methods.....     | 2  |
| Supplemental Table S1 .....   | 7  |
| Supplemental Table S2.....    | 11 |
| Supplemental Table S3.....    | 13 |
| Supplemental Figure S1.....   | 14 |
| Supplemental Figure S2.....   | 15 |
| Supplemental Figure S4.....   | 17 |
| Supplemental Figure S5.....   | 18 |
| Supplemental Figure S6.....   | 19 |
| Supplemental References ..... | 20 |

## **Supplemental Methods**

### **Bulk RNA Sequencing and Analysis**

RNA was extracted from CD19<sup>+</sup> CLL cells or snap frozen LN biopsies using RNeasy kits (Qiagen, Germantown, MD, USA). Total RNA libraries were prepared according to the Illumina TruSeq protocol. Libraries were pooled and sequenced on a HiSeq 2000 (Illumina). Reads were aligned to hg38 using STAR<sup>1</sup>, summarized by featureCounts,<sup>2</sup> and normalized across samples.<sup>3</sup> Counts per million (CPM) were used to measure gene expression. Genes with CPM > 1 in ≥ 3 samples were analyzed in downstream analysis. Paired gene-level differential analysis was conducted using the limma package.<sup>3</sup> Gene Set Enrichment Analysis (GSEA)<sup>4</sup> or overrepresentation analysis using ClusterProfiler<sup>5</sup> was used to test for enrichment of a curated set of lymphocyte gene-expression signatures (Supplemental Table S2). Enrichment was defined as a normalized enrichment score (NES) ≥ 1.6 and FDR < 0.05 with ≥ 5 leading-edge genes and > 20% of total leading-edge genes that were unique to each signature. Some signatures (e.g., HIF1α ↓, KLF2 ↓ and nutrient deprivation ↓) were defined by downregulated genes in a pathway and had a positive NES for pathways enriched in PB samples.

CIBERSORT and the LM22 leukocyte signature matrix<sup>6</sup> was used for deconvolution of bulk RNA-seq data from normal LN samples into 22 immune cell types. For CLL LN samples, CIBERSORT was applied using a custom signature matrix generated by replacing gene expression profiles of naïve and memory B cells with that of CD19<sup>+</sup> CLL cells purified from LN samples.<sup>7</sup> RNA-seq data was quantified in FPKM (Fragments Per Kilobase Million) as input for CIBERSORT.

### **Single cell RNA Sequencing and Analysis**

Individually barcoded single-cell libraries were created from LN SCS with the Chromium Single Cell 3' Reagent Kit V2. Libraries were sequenced on NovaSeq (Illumina) and processed by Cell Ranger Single Cell Software Suite 3.0.1.<sup>8</sup> Genes expressed in < 3 cells and cells with < 200 genes detected or > 10% mitochondrial gene content were filtered.

Downstream analyses were performed on Seurat v3.<sup>9</sup> For each sample, gene expression was normalized to count per 10,000 and the top 2,000 variable genes were identified and scaled with effects of total number of detected genes and mitochondrial gene content regressed out using Seurat functions 'FindVariableFeatures' and 'ScaleData' respectively. Samples were integrated using canonical correlation analysis (CCA) with 30 CCA components. Clustering was done by IKAP,<sup>10</sup> an iterative parameter-choosing algorithm implemented on top of Seurat SNN (Shared Nearest Neighbor) clustering. Differentially expressed genes were identified using Seurat function 'FindMarkers'. G2/M and S scores were computed by Seurat function 'CellCycleScoring'. When integrating PB and LN samples, LN samples were used as reference. As expected, results from downstream analyses of the integrated PB and LN dataset, including visualization in UMAP, were not identical to those obtained from LN single cells only.

RNA velocity was performed by first counting unspliced and spliced mRNA for each LN sample using the package 'velocity' followed by estimating cell transitions using the R packages 'SeuratWrappers' and 'velocity.R' for the deterministic model and the Python packages 'scVelo' for stochastic and dynamical models.<sup>11,12</sup>

All parameters were set as default unless otherwise specified.

### **Whole Exome Sequencing and Analysis**

DNA was extracted from CD19<sup>+</sup> CLL cells using DNeasy kits (Qiagen, Germantown, MD, USA). Libraries were prepared using Agilent SureSelect Human All Exon kit and Nextera DNA Library Prep for Enrichment. Pooled libraries were sequenced on Illumina next-generation sequencers. BAM files were generated from the Picard pipeline then analyzed on the Firehose platform, including quality control, local re-alignment, mutation calling, small insertion and deletion identification, rearrangement detection and coverage calculations.

Somatic mutations were identified in targeted exon data using the MuTect algorithm.<sup>13</sup> Cross-contamination was estimated with ContEst<sup>14</sup> and was used to set the lowest allelic fraction at which somatic mutations could be detected on a per sample basis. Candidate indels were detected using Indelocator. All mutations were filtered using a panel of normal

samples, which removes mutations commonly seen across a large number of sequenced normal (non-cancer) samples. All paired tumor-normal pairs were run through deTiN<sup>15</sup> to estimate the contamination of tumor DNA in the normal sample and keep mutations which would otherwise have been removed by germline filters. For each patient, the union of all point mutations and indels from every sample was created. The mutant and reference allele counts of every mutation in this union were measured in each sample using samtools in a process called force-calling.<sup>16</sup>

Somatic copy number alterations were inferred from the ratio of tumor read depth to the expected read depth derived from a panel of normal samples using the ReCapSeg tool.<sup>17,18</sup> ABSOLUTE<sup>19</sup> was used to estimate sample purity, ploidy, absolute somatic copy number, and the cancer cell fraction (CCF) of mutations. To distinguish subclonal populations, a Bayesian clustering procedure<sup>20,21</sup> was applied to CCFs across PB and LN samples from each patient.

### Key Resources Table

| REAGENT or RESOURCE                        | SOURCE         | IDENTIFIER                       |
|--------------------------------------------|----------------|----------------------------------|
| Antibodies                                 |                |                                  |
| LIVE/DEAD Fixable Aqua Dead Cell Stain Kit | Invitrogen     | Cat# L34965                      |
| HLA-DR FITC (G46-6)                        | BD Biosciences | Cat# 555811,<br>RRID:AB_396145   |
| CCR7 PE-CF594 (150503)                     | BD Biosciences | Cat# 562381,<br>RRID:AB_11153301 |
| CD45RO APC (UCHL1)                         | BD Biosciences | Cat# 559865,<br>RRID:AB_398673   |
| CD3 APC-H7 (SK7 )                          | BD Biosciences | Cat# 560176,<br>RRID:AB_1645475  |
| CD14 V500 (M5E2)                           | BD Biosciences | Cat# 561391,<br>RRID:AB_10611856 |
| CD19 V500 (HIB19)                          | BD Biosciences | Cat# 561121,<br>RRID:AB_10562391 |
| CD8 BV650 (RPA-T8)                         | BD Biosciences | Cat# 563821,<br>RRID:AB_2744462  |
| CD4 BV786 (SK3)                            | BD Biosciences | Cat# 563877,<br>RRID:AB_2738462  |
| Critical Commercial Assays                 |                |                                  |

|                                                     |                                |                                                                                                                                                                         |
|-----------------------------------------------------|--------------------------------|-------------------------------------------------------------------------------------------------------------------------------------------------------------------------|
| CD19 MicroBeads                                     | MACS Miltenyi                  | Cat# 130-097-055                                                                                                                                                        |
| LS Columns                                          | MACS Miltenyi                  | Cat# 130-042-401                                                                                                                                                        |
| LD Columns                                          | MACS Miltenyi                  | Cat# 130-042-901                                                                                                                                                        |
| TruSeq® Stranded Total RNA Library Prep             | Illumina                       | Cat# 20020597                                                                                                                                                           |
| Chromium Single Cell 3' Library and Gel Bead Kit v2 | 10X Genomics                   | Cat# PN-120237                                                                                                                                                          |
| Chromium Single Cell A Chip Kit                     | 10X Genomics                   | Cat# PN-1000009                                                                                                                                                         |
| Agilent SureSelect Human All Exon kit               | Illumina                       | Cat# 20020188                                                                                                                                                           |
| Nextera DNA Library Prep for Enrichment             | Illumina                       | Cat# 20020188                                                                                                                                                           |
| <b>Software and Algorithms</b>                      |                                |                                                                                                                                                                         |
| STAR                                                | Dobin et al., 2013             | <a href="https://github.com/alexdobin/STAR">https://github.com/alexdobin/STAR</a>                                                                                       |
| featureCounts                                       | Liao et al., 2014              | <a href="http://subread.sourceforge.net">http://subread.sourceforge.net</a>                                                                                             |
| limma                                               | Law et al., 2014               | <a href="https://github.com/cran/limma">https://github.com/cran/limma</a>                                                                                               |
| GSEA                                                | Subramanian et al., 2005       | <a href="http://software.broadinstitute.org/gsea/index.jsp">http://software.broadinstitute.org/gsea/index.jsp</a>                                                       |
| clusterProfiler                                     | Yu et al., 2012                | <a href="http://bioconductor.org/packages/release/bioc/html/clusterProfiler.html">http://bioconductor.org/packages/release/bioc/html/clusterProfiler.html</a>           |
| CEMiTool                                            | Russo et al., 2018             | <a href="https://bioconductob.org/packages/relel/bioc/html/CEMiCEMi.html">https://bioconductob.org/packages/relel/bioc/html/CEMiCEMi.html</a>                           |
| Cell Ranger                                         | 10X Genomics                   | <a href="https://bioconductob.org/packages/relel/bioc/html/CEMiCEMi.html">https://bioconductob.org/packages/relel/bioc/html/CEMiCEMi.html</a>                           |
| Seurat                                              | Butler et al., 2018            | <a href="https://satijalab.org/seurat">https://satijalab.org/seurat</a>                                                                                                 |
| Picard                                              | Broad Institute, Cambridge, MA | <a href="http://picard.sourceforge.net">http://picard.sourceforge.net</a>                                                                                               |
| Firehose                                            | Broad Institute, Cambridge, MA | <a href="http://www.broadinstitute.org/cancer/cga/Firehose">http://www.broadinstitute.org/cancer/cga/Firehose</a>                                                       |
| MuTect                                              | Broad Institute, Cambridge, MA | <a href="http://www.broadinstitute.org/cancer/cga/mutect">http://www.broadinstitute.org/cancer/cga/mutect</a>                                                           |
| ContEst                                             | Broad Institute, Cambridge, MA | <a href="https://software.broadinstitute.org/cancer/cga/contest">https://software.broadinstitute.org/cancer/cga/contest</a>                                             |
| Indelocator                                         | Broad Institute, Cambridge, MA | <a href="https://software.broadinstitute.org/cancer/cga/indelocator">https://software.broadinstitute.org/cancer/cga/indelocator</a>                                     |
| ReCapSeg                                            | Broad Institute, Cambridge, MA | <a href="http://gatkforums.broadinstitute.org/gaga/categories/recaps-re-documentation">http://gatkforums.broadinstitute.org/gaga/categories/recaps-re-documentation</a> |

|                |                                              |                                                           |
|----------------|----------------------------------------------|-----------------------------------------------------------|
| FlowJo v10.0.7 | Tree Star, Inc.,<br>Ashland, OR              | <a href="http://www.flowjo.com">http://www.flowjo.com</a> |
| Prism 7        | GraphPad<br>Software, Inc.,<br>San Diego, CA |                                                           |

**Supplemental Table S1. Differentially expressed genes between lymph node and peripheral blood.**

| Gene       | Log <sub>2</sub> FC | p value  | FDR      | Gene      | Log <sub>2</sub> FC | p value  | FDR      |
|------------|---------------------|----------|----------|-----------|---------------------|----------|----------|
| MKI67      | 4.63                | 2.41E-29 | 5.29E-25 | CSF1      | 1.26                | 1.56E-10 | 6.76E-09 |
| FOS        | 4.56                | 3.15E-18 | 3.01E-15 | MYC       | 1.26                | 3.83E-12 | 3.06E-10 |
| FOSB       | 4.48                | 2.20E-16 | 8.79E-14 | HIST1H4A  | 1.25                | 1.08E-10 | 5.02E-09 |
| RGS1       | 3.95                | 1.18E-19 | 1.52E-16 | KIFC1     | 1.25                | 2.66E-13 | 3.49E-11 |
| HIST1H3B   | 3.81                | 2.41E-22 | 1.06E-18 | COL6A3    | 1.25                | 1.16E-07 | 1.73E-06 |
| ASPM       | 3.28                | 1.40E-21 | 5.12E-18 | LDLRAD4   | 1.25                | 1.28E-12 | 1.20E-10 |
| TOP2A      | 3.19                | 1.30E-22 | 9.56E-19 | MMP9      | 1.25                | 1.11E-07 | 1.67E-06 |
| RRM2       | 2.92                | 3.46E-20 | 7.62E-17 | HIST1H3F  | 1.24                | 1.04E-07 | 1.57E-06 |
| CENPF      | 2.90                | 3.89E-19 | 4.76E-16 | FABP5     | 1.24                | 2.11E-12 | 1.86E-10 |
| CCL3       | 2.84                | 2.41E-21 | 7.59E-18 | SAPCD2    | 1.24                | 2.32E-14 | 4.78E-12 |
| HIST2H3C   | 2.77                | 3.33E-17 | 1.88E-14 | ASB2      | 1.24                | 3.37E-15 | 9.26E-13 |
| HIST2H3A   | 2.77                | 2.85E-17 | 1.65E-14 | PIF1      | 1.24                | 2.79E-15 | 7.86E-13 |
| TPX2       | 2.76                | 5.71E-20 | 1.12E-16 | CACNA1D   | 1.23                | 4.11E-11 | 2.20E-09 |
| AC069363.1 | 2.74                | 4.88E-21 | 1.34E-17 | C3        | 1.23                | 1.86E-06 | 1.81E-05 |
| CCL4       | 2.59                | 7.64E-20 | 1.18E-16 | SUSD1     | 1.23                | 1.54E-16 | 6.27E-14 |
| DLGAP5     | 2.59                | 4.95E-18 | 4.03E-15 | CD4       | 1.22                | 7.30E-11 | 3.55E-09 |
| CDK1       | 2.46                | 3.35E-18 | 3.07E-15 | TULP2     | 1.22                | 2.78E-09 | 7.52E-08 |
| NR4A2      | 2.46                | 3.52E-14 | 6.73E-12 | PYCR1     | 1.21                | 8.26E-14 | 1.30E-11 |
| BUB1       | 2.41                | 1.05E-19 | 1.44E-16 | CPNE7     | 1.21                | 4.64E-12 | 3.61E-10 |
| HJURP      | 2.41                | 6.99E-20 | 1.18E-16 | PAG1      | 1.21                | 3.68E-08 | 6.52E-07 |
| KIF14      | 2.32                | 8.04E-17 | 3.77E-14 | PDCD1     | 1.20                | 1.75E-17 | 1.13E-14 |
| BIRC5      | 2.29                | 3.85E-18 | 3.39E-15 | GIMAP5    | 1.20                | 6.73E-09 | 1.57E-07 |
| CEP55      | 2.27                | 1.35E-17 | 9.29E-15 | JUN       | 1.19                | 8.97E-06 | 6.92E-05 |
| DTL        | 2.22                | 1.47E-16 | 6.09E-14 | MCM4      | 1.19                | 4.24E-11 | 2.24E-09 |
| ANLN       | 2.21                | 1.43E-16 | 6.08E-14 | PRKCH     | 1.19                | 1.14E-07 | 1.70E-06 |
| MCM10      | 2.16                | 8.27E-18 | 6.06E-15 | MRC2      | 1.19                | 3.62E-11 | 1.98E-09 |
| POLQ       | 2.16                | 4.21E-18 | 3.56E-15 | ASF1B     | 1.19                | 3.96E-11 | 2.13E-09 |
| KLF4       | 2.15                | 2.61E-10 | 1.05E-08 | LPIN1     | 1.19                | 3.13E-14 | 6.15E-12 |
| KIF23      | 2.07                | 5.41E-17 | 2.83E-14 | EGR3      | 1.18                | 5.89E-08 | 9.78E-07 |
| ESPL1      | 2.07                | 7.28E-16 | 2.43E-13 | KIF20A    | 1.18                | 3.77E-11 | 2.05E-09 |
| CDC45      | 2.04                | 1.21E-16 | 5.33E-14 | LHFP      | 1.18                | 2.69E-12 | 2.25E-10 |
| NCAPH      | 2.03                | 1.70E-17 | 1.13E-14 | DSCC1     | 1.18                | 1.83E-12 | 1.65E-10 |
| CR2        | 2.03                | 1.21E-27 | 1.33E-23 | MRC1      | 1.18                | 1.16E-08 | 2.47E-07 |
| HIST1H3G   | 2.02                | 2.36E-10 | 9.66E-09 | H2AFX     | 1.18                | 3.24E-12 | 2.65E-10 |
| KIF4A      | 2.02                | 5.58E-17 | 2.85E-14 | UHRF1     | 1.17                | 9.10E-11 | 4.31E-09 |
| DUSP1      | 2.02                | 5.67E-12 | 4.22E-10 | CD3E      | 1.17                | 5.91E-10 | 2.04E-08 |
| ZWINT      | 2.01                | 2.58E-17 | 1.53E-14 | PTGER4    | 1.16                | 7.93E-16 | 2.60E-13 |
| CDC45      | 2.00                | 7.60E-18 | 5.77E-15 | CXCL12    | 1.16                | 3.90E-07 | 4.77E-06 |
| MELK       | 2.00                | 2.15E-18 | 2.15E-15 | ARHGAP11A | 1.16                | 2.14E-12 | 1.88E-10 |

|               |      |          |          |
|---------------|------|----------|----------|
| HIST1H3C      | 1.98 | 8.92E-13 | 8.92E-11 |
| SLC40A1       | 1.95 | 1.04E-10 | 4.86E-09 |
| CLSPN         | 1.95 | 7.28E-16 | 2.43E-13 |
| EGR1          | 1.93 | 6.08E-09 | 1.44E-07 |
| DIAPH3        | 1.91 | 1.74E-18 | 1.83E-15 |
| FYB           | 1.90 | 3.65E-11 | 2.00E-09 |
| HSPA1B        | 1.90 | 1.04E-08 | 2.25E-07 |
| DUSP4         | 1.90 | 1.74E-12 | 1.57E-10 |
| CENPE         | 1.89 | 2.37E-17 | 1.45E-14 |
| DST           | 1.89 | 8.10E-10 | 2.66E-08 |
| AC145110.1    | 1.87 | 5.67E-16 | 2.12E-13 |
| ANKRD13B      | 1.87 | 1.32E-17 | 9.29E-15 |
| VCAM1         | 1.86 | 5.57E-11 | 2.85E-09 |
| DUSP2         | 1.84 | 1.64E-13 | 2.37E-11 |
| HMMR          | 1.84 | 5.00E-14 | 8.80E-12 |
| KIF18B        | 1.84 | 8.84E-16 | 2.86E-13 |
| TICRR         | 1.84 | 1.60E-15 | 4.75E-13 |
| CDCA2         | 1.83 | 4.58E-15 | 1.23E-12 |
| CKAP2L        | 1.83 | 2.31E-15 | 6.61E-13 |
| UBE2C         | 1.81 | 8.09E-14 | 1.29E-11 |
| SEMA7A        | 1.80 | 3.96E-17 | 2.18E-14 |
| SLC2A3        | 1.77 | 1.09E-14 | 2.47E-12 |
| RGS2          | 1.72 | 9.20E-08 | 1.42E-06 |
| DUSP6         | 1.72 | 9.26E-15 | 2.15E-12 |
| TROAP         | 1.71 | 3.92E-14 | 7.43E-12 |
| TTK           | 1.70 | 4.17E-14 | 7.64E-12 |
| CDC6          | 1.70 | 7.25E-13 | 7.59E-11 |
| GTSE1         | 1.67 | 4.12E-14 | 7.62E-12 |
| RP11-452K12.6 | 1.67 | 3.71E-13 | 4.44E-11 |
| EXO1          | 1.67 | 3.99E-15 | 1.08E-12 |
| NUSAP1        | 1.66 | 5.91E-16 | 2.17E-13 |
| PPP1R15A      | 1.66 | 1.65E-12 | 1.52E-10 |
| CDC25A        | 1.64 | 1.24E-14 | 2.76E-12 |
| IPCEF1        | 1.63 | 9.16E-17 | 4.20E-14 |
| EGR2          | 1.62 | 1.05E-11 | 7.15E-10 |
| SIGLEC1       | 1.62 | 3.41E-11 | 1.87E-09 |
| CDK5R1        | 1.60 | 6.41E-18 | 5.04E-15 |
| AURKB         | 1.59 | 1.17E-15 | 3.64E-13 |
| DCAF12        | 1.58 | 3.96E-14 | 7.44E-12 |
| CD1C          | 1.58 | 1.44E-10 | 6.33E-09 |

|               |      |          |          |
|---------------|------|----------|----------|
| RP11-452K12.7 | 1.15 | 4.47E-12 | 3.50E-10 |
| TNFRSF9       | 1.15 | 1.92E-10 | 8.12E-09 |
| XRCC2         | 1.14 | 3.51E-12 | 2.83E-10 |
| ITK           | 1.14 | 7.36E-08 | 1.18E-06 |
| CCL4L2        | 1.14 | 1.35E-14 | 2.98E-12 |
| NUF2          | 1.14 | 8.15E-10 | 2.67E-08 |
| PAQR4         | 1.13 | 6.13E-14 | 1.04E-11 |
| FAM72C        | 1.13 | 1.48E-11 | 9.32E-10 |
| BRCA1         | 1.12 | 1.78E-13 | 2.55E-11 |
| CCR6          | 1.12 | 5.81E-09 | 1.39E-07 |
| NME1          | 1.12 | 1.50E-11 | 9.36E-10 |
| E2F1          | 1.11 | 2.67E-13 | 3.49E-11 |
| IL2RB         | 1.11 | 1.70E-11 | 1.04E-09 |
| DMXL2         | 1.11 | 5.10E-07 | 6.01E-06 |
| BCAR3         | 1.11 | 4.08E-14 | 7.61E-12 |
| IL21R         | 1.11 | 5.32E-12 | 4.02E-10 |
| RP11-564A8.4  | 1.10 | 1.03E-11 | 7.03E-10 |
| CCDC152       | 1.10 | 1.52E-06 | 1.54E-05 |
| CD2           | 1.09 | 6.81E-09 | 1.59E-07 |
| CTD-2313F11.1 | 1.09 | 8.89E-08 | 1.38E-06 |
| RP11-564A8.8  | 1.09 | 5.31E-11 | 2.73E-09 |
| UBE2T         | 1.09 | 3.10E-13 | 3.86E-11 |
| FAM72D        | 1.09 | 7.49E-12 | 5.35E-10 |
| FMNL3         | 1.09 | 2.87E-15 | 8.00E-13 |
| ABCG1         | 1.08 | 5.98E-09 | 1.42E-07 |
| HIST2H4B      | 1.08 | 3.10E-09 | 8.22E-08 |
| SLC2A14       | 1.08 | 1.13E-08 | 2.41E-07 |
| HIST2H4A      | 1.08 | 3.05E-09 | 8.13E-08 |
| SLC29A1       | 1.08 | 2.43E-11 | 1.40E-09 |
| FAM95B1       | 1.08 | 6.62E-11 | 3.28E-09 |
| FABP5P7       | 1.07 | 3.29E-11 | 1.82E-09 |
| HIST1H1B      | 1.07 | 4.69E-06 | 4.01E-05 |
| FAM95B1       | 1.07 | 5.94E-11 | 3.00E-09 |
| MIR4435-2HG   | 1.07 | 3.02E-12 | 2.49E-10 |
| IL21R-AS1     | 1.07 | 2.11E-11 | 1.24E-09 |
| C1QB          | 1.07 | 1.06E-08 | 2.29E-07 |
| PLK3          | 1.06 | 6.44E-16 | 2.25E-13 |
| GF11          | 1.06 | 3.82E-13 | 4.54E-11 |
| RP11-146D12.2 | 1.05 | 5.91E-11 | 3.00E-09 |
| PTGDS         | 1.05 | 1.75E-08 | 3.46E-07 |



|               |      |          |          |
|---------------|------|----------|----------|
| RP11-293M10.2 | 1.54 | 5.21E-12 | 3.97E-10 |
| SLCO2B1       | 1.54 | 8.71E-10 | 2.83E-08 |
| CCND2         | 1.52 | 2.17E-22 | 1.06E-18 |
| PRR11         | 1.52 | 1.17E-14 | 2.63E-12 |
| TYMS          | 1.52 | 4.53E-14 | 8.17E-12 |
| KIF2C         | 1.52 | 6.84E-16 | 2.35E-13 |
| DAB2          | 1.51 | 8.73E-10 | 2.83E-08 |
| CD69          | 1.50 | 8.95E-12 | 6.18E-10 |
| TNFAIP2       | 1.49 | 9.78E-09 | 2.13E-07 |
| CCNB1         | 1.49 | 2.45E-13 | 3.26E-11 |
| CKS2          | 1.47 | 4.17E-16 | 1.61E-13 |
| DEPDC1B       | 1.47 | 9.96E-15 | 2.28E-12 |
| RGCC          | 1.46 | 4.43E-10 | 1.64E-08 |
| KIAA0101      | 1.46 | 2.92E-12 | 2.42E-10 |
| IQGAP3        | 1.45 | 1.52E-14 | 3.21E-12 |
| KLF10         | 1.45 | 4.55E-10 | 1.67E-08 |
| ETV5          | 1.44 | 1.41E-14 | 3.08E-12 |
| SHCBP1        | 1.44 | 2.57E-12 | 2.16E-10 |
| BUB1B         | 1.43 | 5.83E-12 | 4.31E-10 |
| RP11-4O1.2    | 1.43 | 6.33E-17 | 3.17E-14 |
| CD83          | 1.43 | 6.20E-16 | 2.20E-13 |
| ESCO2         | 1.43 | 5.52E-13 | 6.07E-11 |
| PKMYT1        | 1.42 | 4.97E-15 | 1.29E-12 |
| NR4A3         | 1.42 | 5.41E-12 | 4.08E-10 |
| TBC1D4        | 1.42 | 3.03E-08 | 5.50E-07 |
| NEK2          | 1.40 | 8.60E-13 | 8.68E-11 |
| SEPP1         | 1.40 | 8.08E-08 | 1.27E-06 |
| ZMIZ1         | 1.39 | 7.92E-14 | 1.27E-11 |
| RP11-823E8.3  | 1.39 | 9.00E-13 | 8.96E-11 |
| MFSD2A        | 1.38 | 8.04E-20 | 1.18E-16 |
| SPC24         | 1.37 | 1.18E-12 | 1.13E-10 |
| BTBD19        | 1.37 | 3.43E-16 | 1.35E-13 |
| STUM          | 1.36 | 6.48E-15 | 1.63E-12 |
| INPP4B        | 1.36 | 1.26E-10 | 5.61E-09 |
| CDCA7         | 1.35 | 1.98E-12 | 1.76E-10 |
| CDCA3         | 1.35 | 1.35E-12 | 1.26E-10 |
| MAF           | 1.33 | 5.81E-11 | 2.96E-09 |
| DTHD1         | 1.33 | 1.14E-08 | 2.44E-07 |
| RP11-167N4.4  | 1.33 | 2.24E-09 | 6.28E-08 |
| HSPA1A        | 1.32 | 3.12E-07 | 3.97E-06 |

|               |       |          |          |
|---------------|-------|----------|----------|
| THBS1         | 1.05  | 1.25E-06 | 1.31E-05 |
| RP11-347P5.1  | 1.05  | 1.94E-08 | 3.76E-07 |
| NELL2         | 1.05  | 1.04E-08 | 2.25E-07 |
| UBE2S         | 1.04  | 8.50E-12 | 5.95E-10 |
| TIMD4         | 1.04  | 1.65E-10 | 7.06E-09 |
| CHI3L2        | 1.04  | 6.27E-11 | 3.15E-09 |
| HK2           | 1.04  | 7.36E-15 | 1.80E-12 |
| LINC00996     | 1.03  | 1.54E-11 | 9.56E-10 |
| ST8SIA1       | 1.03  | 9.18E-08 | 1.42E-06 |
| ECT2          | 1.03  | 5.15E-10 | 1.85E-08 |
| WDFY3         | 1.03  | 1.63E-07 | 2.29E-06 |
| BRIP1         | 1.03  | 6.31E-11 | 3.16E-09 |
| LMNA          | 1.03  | 9.25E-05 | 5.06E-04 |
| APOE          | 1.03  | 2.76E-07 | 3.57E-06 |
| KIF11         | 1.03  | 1.20E-12 | 1.14E-10 |
| FAM72B        | 1.02  | 1.77E-11 | 1.07E-09 |
| PTPN7         | 1.02  | 7.78E-14 | 1.27E-11 |
| SPRED1        | 1.02  | 8.33E-09 | 1.88E-07 |
| GINS1         | 1.01  | 1.22E-10 | 5.48E-09 |
| IL7R          | 1.01  | 1.27E-05 | 9.35E-05 |
| METTL1        | 1.01  | 1.27E-15 | 3.87E-13 |
| SH2D1A        | 1.01  | 1.13E-08 | 2.42E-07 |
| PLXNB2        | 1.01  | 9.51E-10 | 3.06E-08 |
| MIR222HG      | 1.01  | 6.97E-13 | 7.38E-11 |
| CCL5          | 1.00  | 1.71E-08 | 3.41E-07 |
| SGK1          | 1.00  | 7.86E-11 | 3.82E-09 |
| DNASE1L3      | 1.00  | 5.57E-12 | 4.18E-10 |
| RASSF4        | 1.00  | 1.53E-09 | 4.58E-08 |
| RP11-876N24.1 | 1.00  | 4.27E-11 | 2.25E-09 |
| ITGAD         | 1.00  | 5.75E-10 | 2.01E-08 |
| LPL           | 1.00  | 1.43E-11 | 9.08E-10 |
| MAP1B         | -1.00 | 5.34E-10 | 1.90E-08 |
| CTD-3224K15.2 | -1.00 | 4.14E-11 | 2.20E-09 |
| RP5-1042I8.7  | -1.01 | 8.08E-15 | 1.95E-12 |
| STMN3         | -1.01 | 4.65E-13 | 5.33E-11 |
| PLAC8         | -1.02 | 7.81E-09 | 1.78E-07 |
| LINC00264     | -1.02 | 8.06E-13 | 8.25E-11 |
| AC092620.3    | -1.02 | 1.60E-13 | 2.33E-11 |
| RXFP4         | -1.04 | 6.92E-10 | 2.34E-08 |
| TLE1          | -1.05 | 3.17E-10 | 1.25E-08 |

|               |      |          |          |
|---------------|------|----------|----------|
| CDCA8         | 1.32 | 1.84E-12 | 1.66E-10 |
| RP11-424C20.2 | 1.32 | 5.54E-15 | 1.42E-12 |
| CD163L1       | 1.32 | 3.87E-09 | 9.82E-08 |
| SOCS3         | 1.32 | 4.56E-10 | 1.67E-08 |
| ICAM1         | 1.32 | 6.58E-15 | 1.63E-12 |
| DOK3          | 1.32 | 7.29E-17 | 3.55E-14 |
| RP5-1028K7.2  | 1.32 | 1.51E-11 | 9.44E-10 |
| CD163         | 1.31 | 1.28E-08 | 2.69E-07 |
| CD28          | 1.31 | 9.09E-11 | 4.31E-09 |
| CCND2-AS1     | 1.31 | 1.86E-17 | 1.17E-14 |
| BCL11B        | 1.31 | 2.89E-10 | 1.15E-08 |
| PBK           | 1.30 | 8.11E-13 | 8.26E-11 |
| PHACTR1       | 1.30 | 1.39E-20 | 3.39E-17 |
| THEMIS        | 1.30 | 4.63E-09 | 1.15E-07 |
| CIT           | 1.29 | 1.05E-12 | 1.02E-10 |
| CDC20         | 1.29 | 4.61E-10 | 1.68E-08 |
| SPAG5         | 1.29 | 1.23E-12 | 1.15E-10 |
| MPEG1         | 1.29 | 4.17E-11 | 2.22E-09 |
| AURKA         | 1.29 | 1.16E-10 | 5.24E-09 |
| GZMK          | 1.29 | 6.88E-08 | 1.11E-06 |
| SKA3          | 1.28 | 5.06E-13 | 5.73E-11 |
| AICDA         | 1.27 | 4.88E-08 | 8.34E-07 |
| CXCL9         | 1.27 | 1.34E-08 | 2.78E-07 |
| RRP12         | 1.26 | 5.32E-13 | 5.91E-11 |

|               |       |          |          |
|---------------|-------|----------|----------|
| SSBP2         | -1.06 | 4.05E-11 | 2.17E-09 |
| KLF11         | -1.06 | 5.87E-12 | 4.32E-10 |
| KLF7          | -1.06 | 8.56E-08 | 1.34E-06 |
| RP5-1068E13.7 | -1.07 | 4.93E-16 | 1.87E-13 |
| CRIP2         | -1.10 | 7.58E-07 | 8.46E-06 |
| RP11-231E19.1 | -1.11 | 1.19E-11 | 7.79E-10 |
| KCNH2         | -1.11 | 1.22E-10 | 5.46E-09 |
| VCAN          | -1.13 | 1.58E-06 | 1.59E-05 |
| EMP3          | -1.13 | 1.46E-14 | 3.15E-12 |
| HRK           | -1.15 | 1.04E-10 | 4.84E-09 |
| CA14          | -1.16 | 4.21E-12 | 3.32E-10 |
| RP11-128B16.5 | -1.20 | 2.01E-13 | 2.80E-11 |
| BCL7A         | -1.26 | 6.68E-11 | 3.30E-09 |
| RP1-140C12.2  | -1.27 | 6.09E-20 | 1.12E-16 |
| RP11-96K19.4  | -1.30 | 4.74E-14 | 8.41E-12 |
| KLF3          | -1.32 | 5.61E-13 | 6.15E-11 |
| CSRP2         | -1.34 | 1.50E-13 | 2.23E-11 |
| ARRDC3        | -1.35 | 7.30E-13 | 7.59E-11 |
| PDK4          | -1.40 | 5.13E-07 | 6.04E-06 |
| TXNIP         | -1.65 | 7.12E-19 | 7.85E-16 |
| HBA1          | -2.06 | 2.84E-08 | 5.21E-07 |
| HBA2          | -2.12 | 1.82E-08 | 3.57E-07 |
| HBB           | -2.50 | 9.69E-10 | 3.10E-08 |

FC: fold-change; FDR: false discovery rate

**Supplemental Table S2. Curated list of gene expression signatures.**

| Signature         | Description                           | Reference                                                                                                                    |
|-------------------|---------------------------------------|------------------------------------------------------------------------------------------------------------------------------|
| activation_BCR    | BCR target genes_LN UP                | Herishanu et al. Blood 117:563 (2011)                                                                                        |
| BAnergyUp-1       | B_cell_up_anergy                      | Glynne et al. Nature 403:672 (2000)                                                                                          |
| BCL6-1            | BCL6_repressed                        | Shaffer et al. Immunity 13:199 (2000)                                                                                        |
| Blimp-1           | Blimp_Bcell_repressed                 | Shaffer et al. Immunity 17:51 (2002)                                                                                         |
| CD40Dn-1          | CD40_downregulated_Burkitt_lymphoma   | Basso et al. Blood 104:4088 (2004)                                                                                           |
| CD40Up-1          | CD40_upregulated_Burkitt_lymphoma     | Basso et al. Blood 104:4088 (2004)                                                                                           |
| E2F3Up-1          | E2F3_overexpression_2x_up             | Bild et al. Nature 439:353 (2006)                                                                                            |
| HIF1aDn-1         | HIF1alpha_1.5x_down                   | Manalo et al. Blood 105:659 (2005)                                                                                           |
| HIF1aUp-1         | HIF1alpha_1.5x_Up                     | Manalo et al. Blood 105:659 (2005)                                                                                           |
| HRASDn-1          | HRAS_overexpression_2x_down           | Bild et al. Nature 439:353 (2006)                                                                                            |
| HRASUp-1          | HRAS_overexpression_2x_up             | Bild et al. Nature 439:353 (2006)                                                                                            |
| IFN-1             | IFN_PMBC_2x_Up                        | Baechler et al. PNAS 100:2610 (2003)                                                                                         |
| Ig-1              | Immunoglobulin_Node2868               | Su et al. PNAS 101:6062 (2004)                                                                                               |
| IL10Up-1          | IL10_OCILy3_Up                        | Lam et al. Blood. 111:3701 (2008)                                                                                            |
| IL-4_reg          | IL-4 target genes_CLL                 | Ruiz-Lafuente et al. PLOSone 9 (2014)                                                                                        |
| IL6Up-4           | IL6_OCILy10_Up_all                    | Lam et al. Blood. 111:3701 (2008)                                                                                            |
| IRF3-1            | IRF3_target_gene                      | Ogawa et al. Cell 122:707 (2005)                                                                                             |
| IRF4Up-3          | IRF4_myeloma_induced_all              | Shaffer et al. Nature. 454:226 (2008)                                                                                        |
| JAKUp-1           | JAK_IL10_Ly10_Up                      | Lam et al. Blood. 111:3701 (2008)                                                                                            |
| KLF2Dn-2          | KLF2_repressed                        | Haaland et al. Mol. Immunol. 42:627 (2005)                                                                                   |
| KLF2Up-1          | KLF2_induced                          | Haaland et al. Mol. Immunol. 42:627 (2005)                                                                                   |
| KRASDn-1          | KRAS_Down                             | Sweet-Cordero et al. Nat Genet 37:48 (2005)                                                                                  |
| KRASUp-1          | KRAS_Up                               | Sweet-Cordero et al. Nat Genet 37:48 (2005)                                                                                  |
| MCL_proliferation | Proliferation_MCL                     | Rosenwald et al. Cancer Cell. 3:185 (2003)                                                                                   |
| MYCDn-1           | Myc_overexpression_2x_down            | Bild et al. Nature 439:353 (2006)                                                                                            |
| MYCUp-2           | Myc_overexpression_1.5x_up            | Bild et al. Nature 439:353 (2006)                                                                                            |
| NFkB-1-3-10       | NFkB_Up_all_OCILy3_Ly10_K1106_HBL1    | Lam et al. Clinical Cancer Research 11:1 (2005) & Staudt Lab unpublished data                                                |
| NotchDN1-2-3      | Notch_T-ALL_down_Weng_Sharma_Palomero | Weng et al. Genes Dev 20:2096 (2006)<br>Sharma et al. Mol Cell Biol 26:8022 (2006)<br>Palomero et al. PNAS, 103:18261 (2006) |
| NotchUP1-2-4      | Notch_T-ALL_up_Weng_Sharma_Palomero   | Weng et al. Genes Dev 20:2096 (2006)<br>Sharma et al. Mol Cell Biol 26:8022 (2006)<br>Palomero et al. PNAS, 103:18261 (2006) |
| p53up-1           | p53_up_Xray                           | Rosenwald et al. Blood. 104:1428 (2004)                                                                                      |
| PAX5-1            | PAX5_repressed                        | Delogu et al. Immunity 24:269 (2006)                                                                                         |
| PGC1up-1          | PGC-1alpha_overexpression_up          | Mootha et al. Nature Genetics 34:267 (2003)                                                                                  |
| Quiesce-1         | Quiescence_heme_all                   | Su et al. PNAS 101:6062 (2004)                                                                                               |
| SerumDown         | Serum_response_Fb_down                | Chang et al. PLOS Biol 2:206 (2004)                                                                                          |
| SerumUp           | Serum_response_Fb_up                  | Chang et al. PLOS Biol 2:206 (2004)                                                                                          |
| SREBPUp-1         | SREBP1a&2_up_Scap_dep                 | Horton et al. PNAS 100:12027 (2003)                                                                                          |
| StarveDn-4        | Glutamine_Glucose_starve_both_down    | Peng et al. MCB 22:5575 (2002)                                                                                               |

|             |                                               |                                            |
|-------------|-----------------------------------------------|--------------------------------------------|
| StarveUp-4  | Glutamine_Glucose_starve_bot<br>h_up          | Peng et al. MCB 22:5575 (2002)             |
| STAT3Up-1-2 | STAT3_up_OCILy10_high_ABC<br>DLBCL_subgroup   | Lam et al. Blood. 111:3701 (2008)          |
| TActDn-5    | Tcell_Plrep_CsAup4x                           | Feske et al. Nat Immunol 2:316 (2001)      |
| TActUp-5    | Tcell_Plind_CsAdown4x                         | Feske et al. Nat Immunol 2:316 (2001)      |
| TAnergy-1   | T_cell_up_ionomycin_anergy                    | Macian et al. Cell 109:719 (2002)          |
| TcytDn-1    | Tcell_cytokine_repressed                      | Kovanen et al. J Biol Chem 278:5205 (2003) |
| TcytUp-6    | Tcell_cytokine_induced_PMBC_<br>Bcell_induced | Kovanen et al. J Biol Chem 278:5205 (2003) |
| TGFBDn-1-2  | TGFbeta_down_epithelial_small<br>_large       | Kang et al. Mol Cell 11:915-26 (2003)      |
| TGFBU-5-6   | TGFbeta_up_epithelial_small_la<br>rge         | Kang et al. Mol Cell 11:915-26 (2003)      |
| TLR-1       | DC_TLR4_TLR8_synergy                          | Napolitani et al. Nat Immunol 6:769 (2005) |
| TLR-CpG     | TLR_Target_genes_CpG_stim                     | Bomben et al. Leukemia 26:1584 (2012)      |
| XBP-1       | XBP1_target_all                               | Shaffer et al. Immunity 2004 21:81-93      |

**Supplemental Table S3. Genes overexpressed in lymph node relative to peripheral blood in shifted and stable groups of patients.**

| Shifted Group |               |
|---------------|---------------|
| CENPF         | MTFP1         |
| HIST1H3B      | FAM72A        |
| HIST2H3C      | ABCG1         |
| HIST2H3A      | AC009237.8    |
| CPNE7         | TMEM75        |
| ESPL1         | KIAA0101      |
| PIF1          | RP11-146D12.2 |
| PKMYT1        | FAM95B1       |
| UHRF1         | FAM95B1       |
| SPC24         | CDT1          |
| CDCA3         | E2F2          |
| CDC25A        | PLPP3         |
| HIST1H3C      | DTX1          |
| ESCO2         | RASAL1        |
| CDC20         | BNIP3P41      |
| ARHGAP11A     | TNS3          |
| RP4-569M23.4  | C3            |
| CIT           | VASH2         |
| RECQL4        | GLYATL2       |
| CENPI         | HIST1H2AB     |
| RP4-569M23.2  | IQGAP2        |
| CDCA8         |               |

| Stable Group  |              |
|---------------|--------------|
| SLC2A3        | SGK1         |
| RGS1          | ANK2         |
| FOS           | DUSP5        |
| RP11-823E8.3  | CD2          |
| FOSB          | LGMN         |
| SLC40A1       | GZMK         |
| DST           | RP11-347P5.1 |
| DUSP6         | A2M          |
| CD4           | SORL1        |
| NR4A3         | IL7R         |
| FYB           | SIK1         |
| CD83          | MIR24-2      |
| NR4A2         | TC2N         |
| APOE          | RP11-52J3.3  |
| INPP4B        | CTLA4        |
| DUSP1         | LMNA         |
| CD69          | CD96         |
| SOCS3         | RGS2         |
| RGCC          |              |
| RP11-293M10.2 |              |
| TBC1D4        |              |
| FRMD4B        |              |

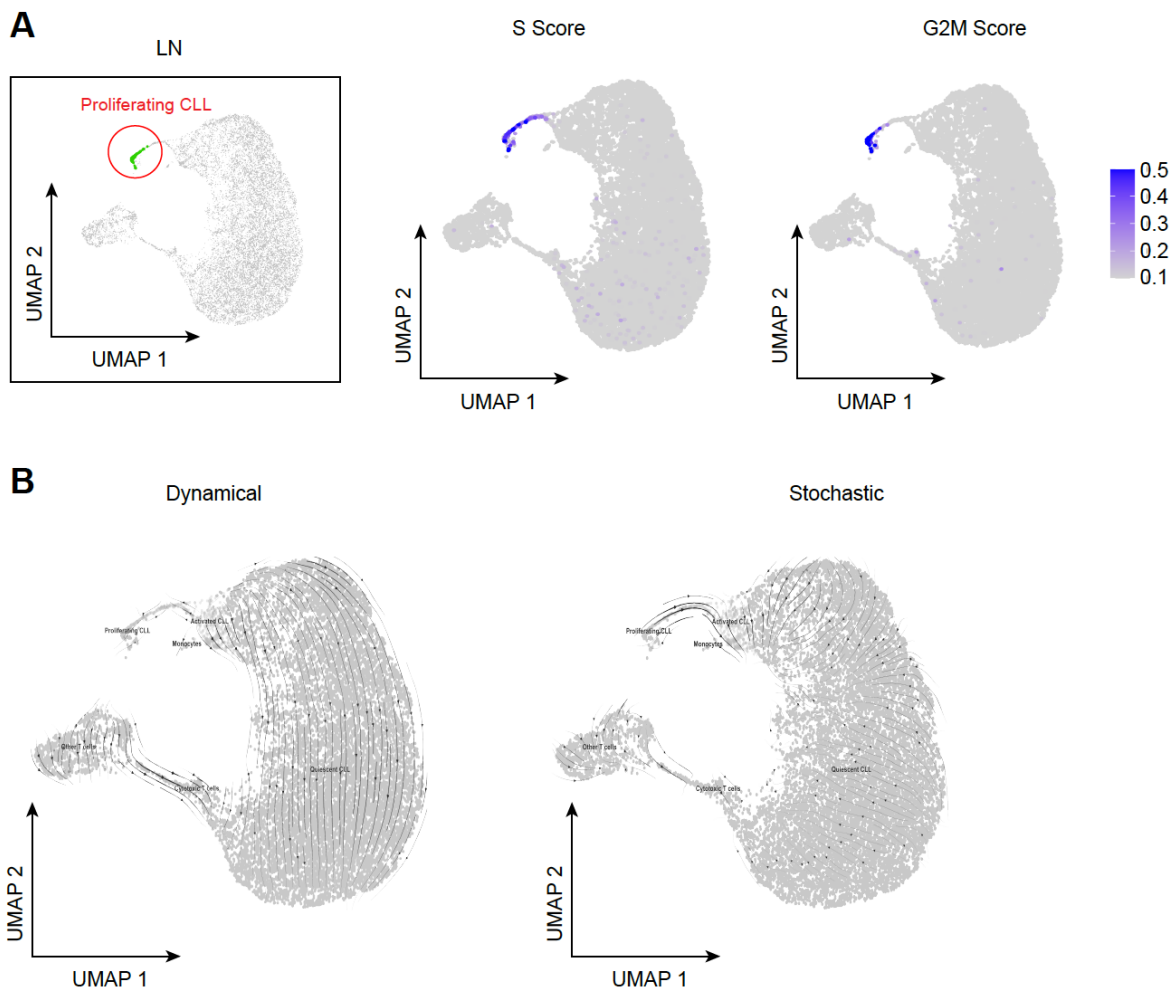

**Supplemental Figure S1. Characteristics of activated and proliferating CLL cells.** (A) Uniform Manifold Approximation and Projection (UMAP) of G2/M and S phase markers show overexpression in proliferating CLL cluster in LN samples. (B) RNA velocities derived from dynamical and stochastic modeling projected on a UMAP of single cells.

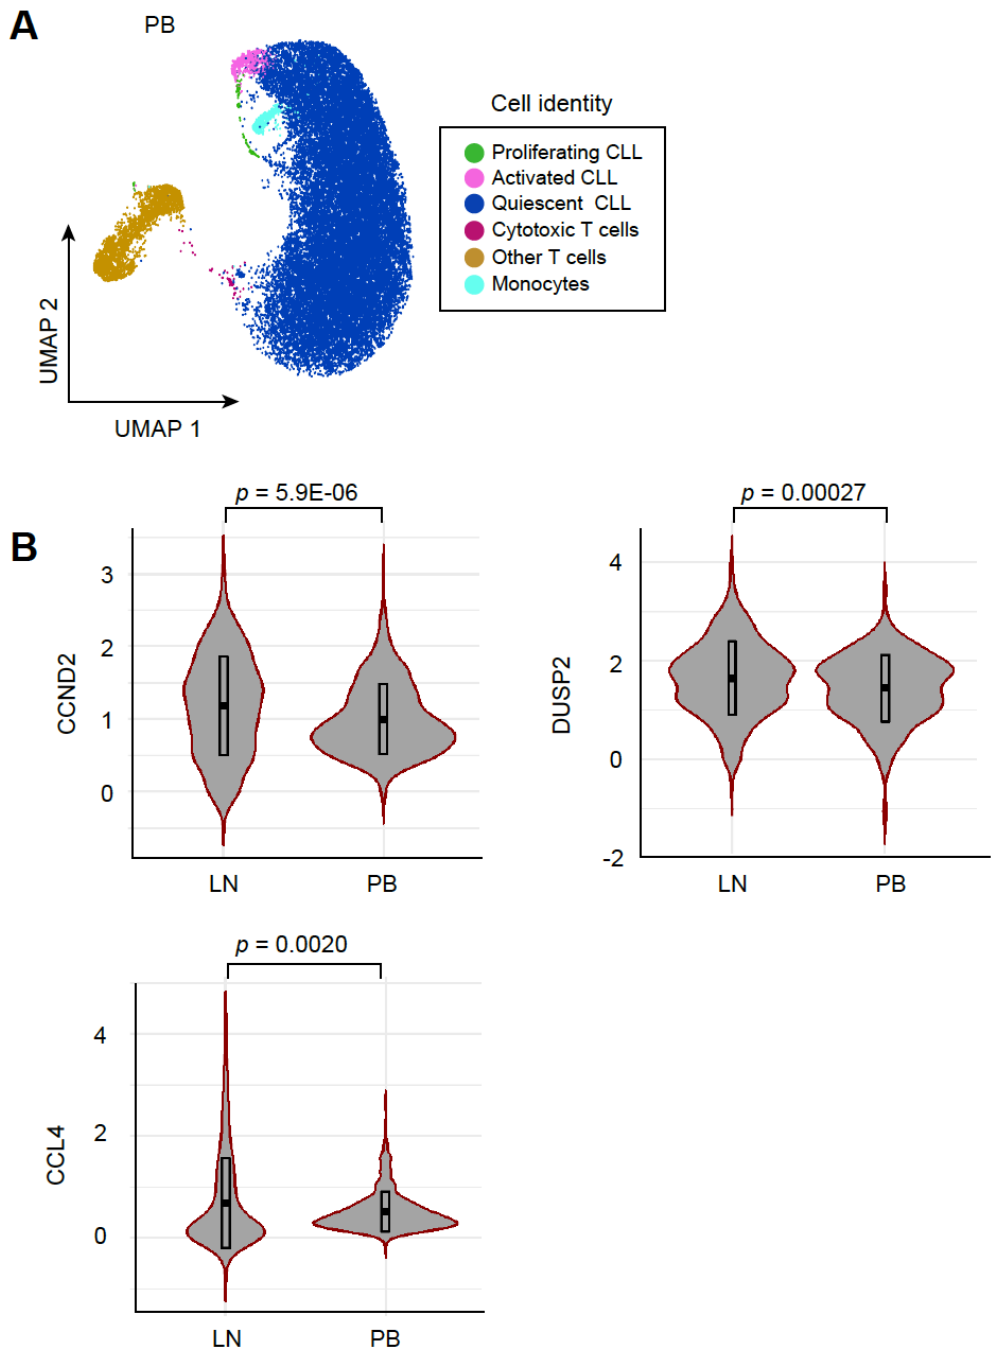

**Supplemental Figure S2. Differences in activated CLL cells between LN and PB.** (A) UMAP and clustering of cell identities of peripheral blood (PB) single cells from the integrated dataset of PB and lymph node (LN) samples. (B) Violin plots of *CCND2*, *DUSP2*, and *CCL4* expression of single cells in LN and PB. Bars indicate mean  $\pm$  standard deviation.

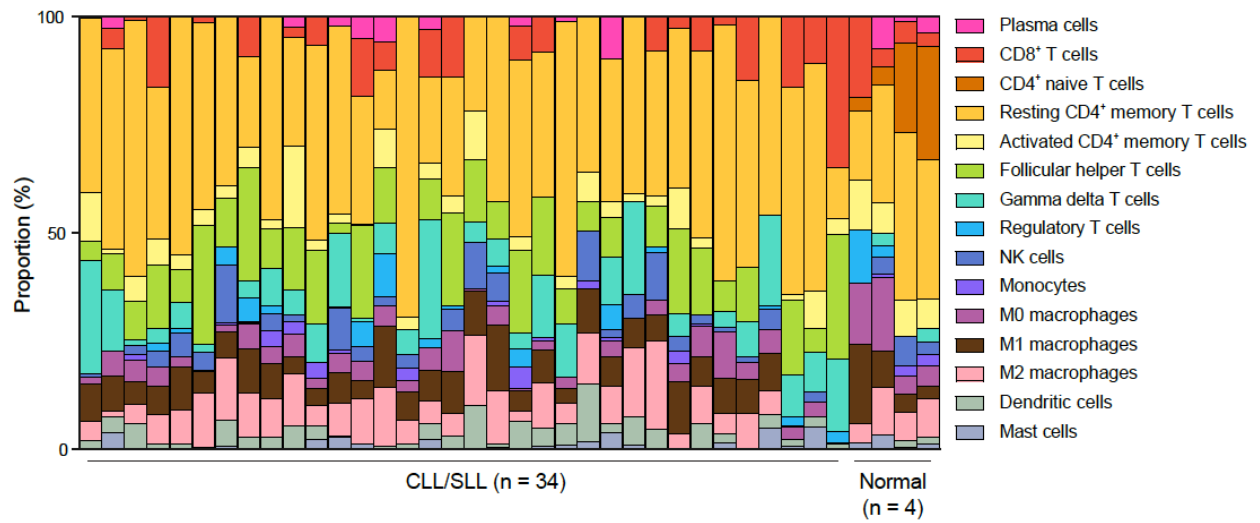

**Supplemental Figure S3. Deconvolution of LN transcriptomes.** Abundance of the indicated non-CLL/non-B cell types as estimated by CIBERSORT deconvolution of bulk RNA-seq data in individual LN samples.



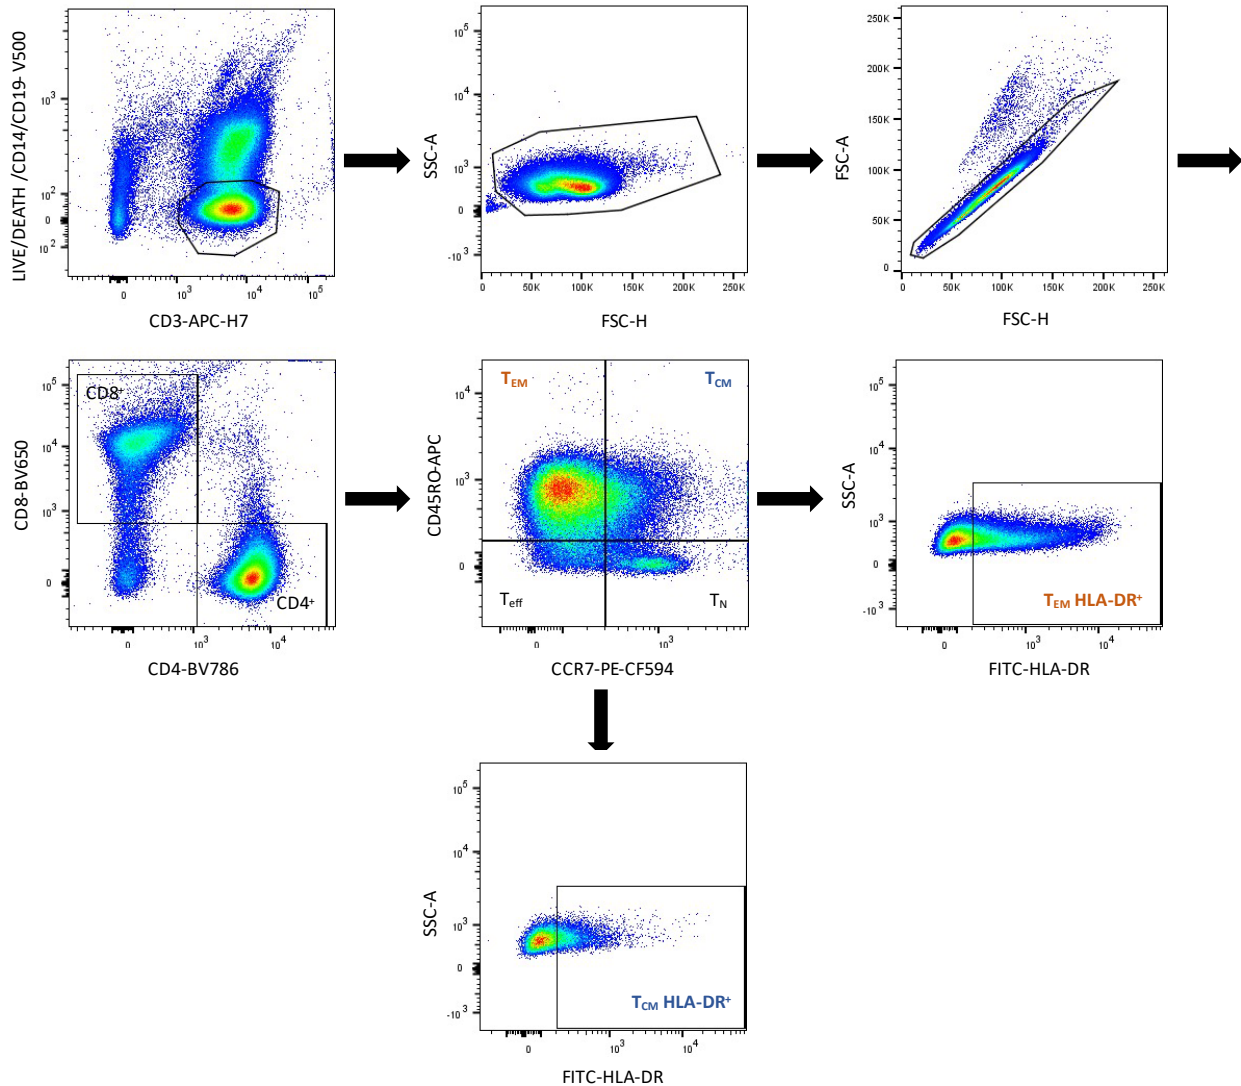

**Supplemental Figure S4. Gating strategy for activated CD4<sup>+</sup> memory T-cell subsets.** Live CD3<sup>+</sup> cells were first selected, then cell debris and doublets were excluded. T cells were subdivided based on the expression of CD4 and CD8. CD4<sup>+</sup> effector memory T cells (T<sub>EM</sub>) and central memory T cells (T<sub>CM</sub>) were defined by CD45RO<sup>+</sup>CCR7<sup>-</sup> and CD45RO<sup>+</sup>CCR7<sup>+</sup>, respectively. HLA-DR<sup>+</sup> cells in each subset were gated in the final step.

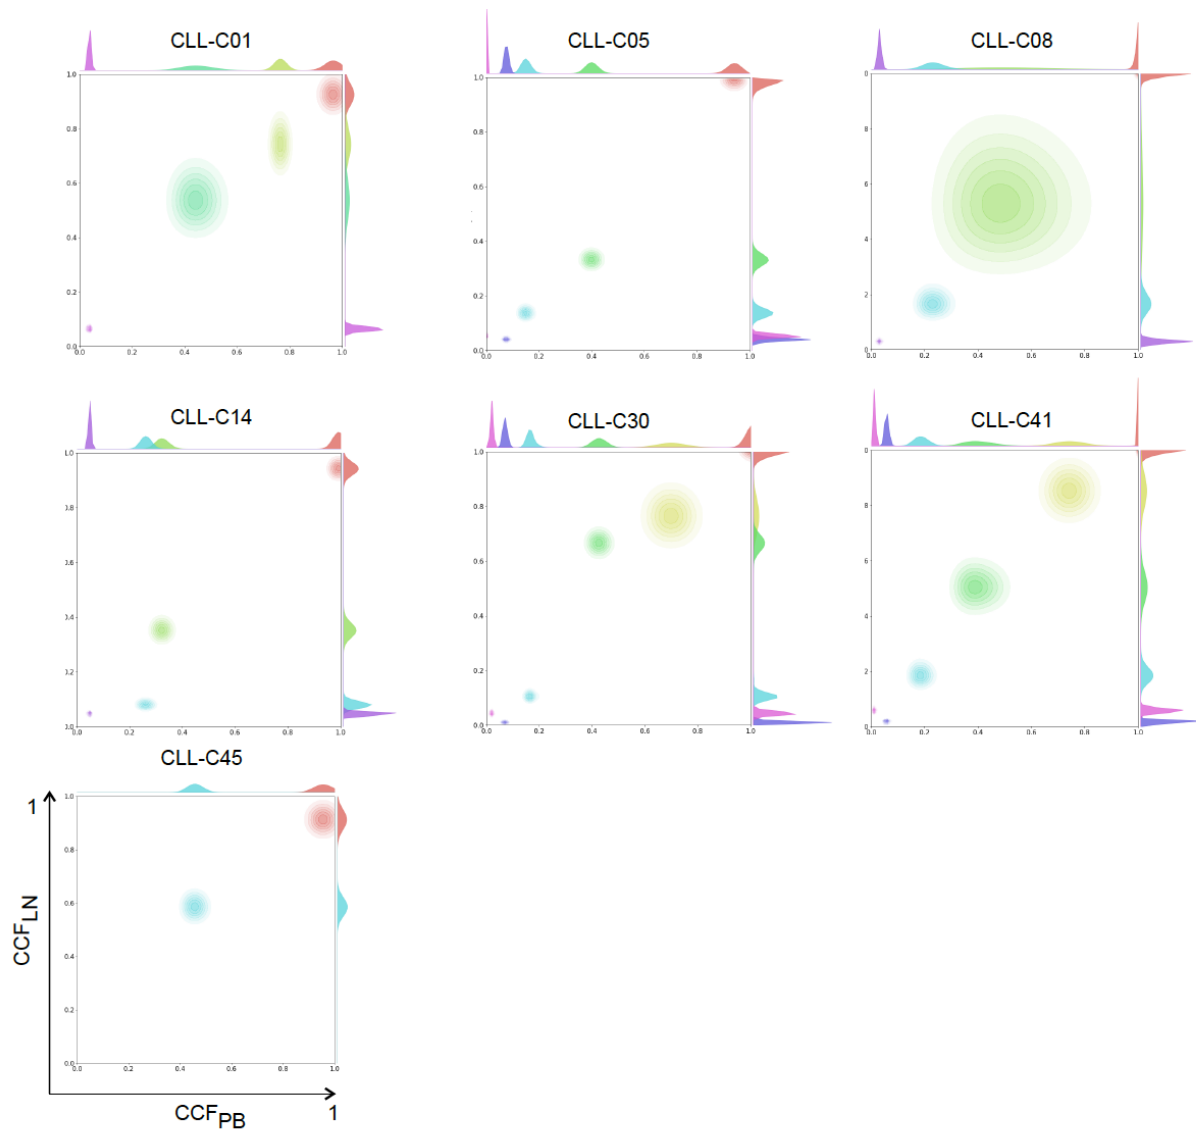

**Supplemental Figure S5. Patients without genetic compartmentalization between PB and LN.** Density plots of CCF in PB and LN in patients with no subclonal expansion in either PB or LN.

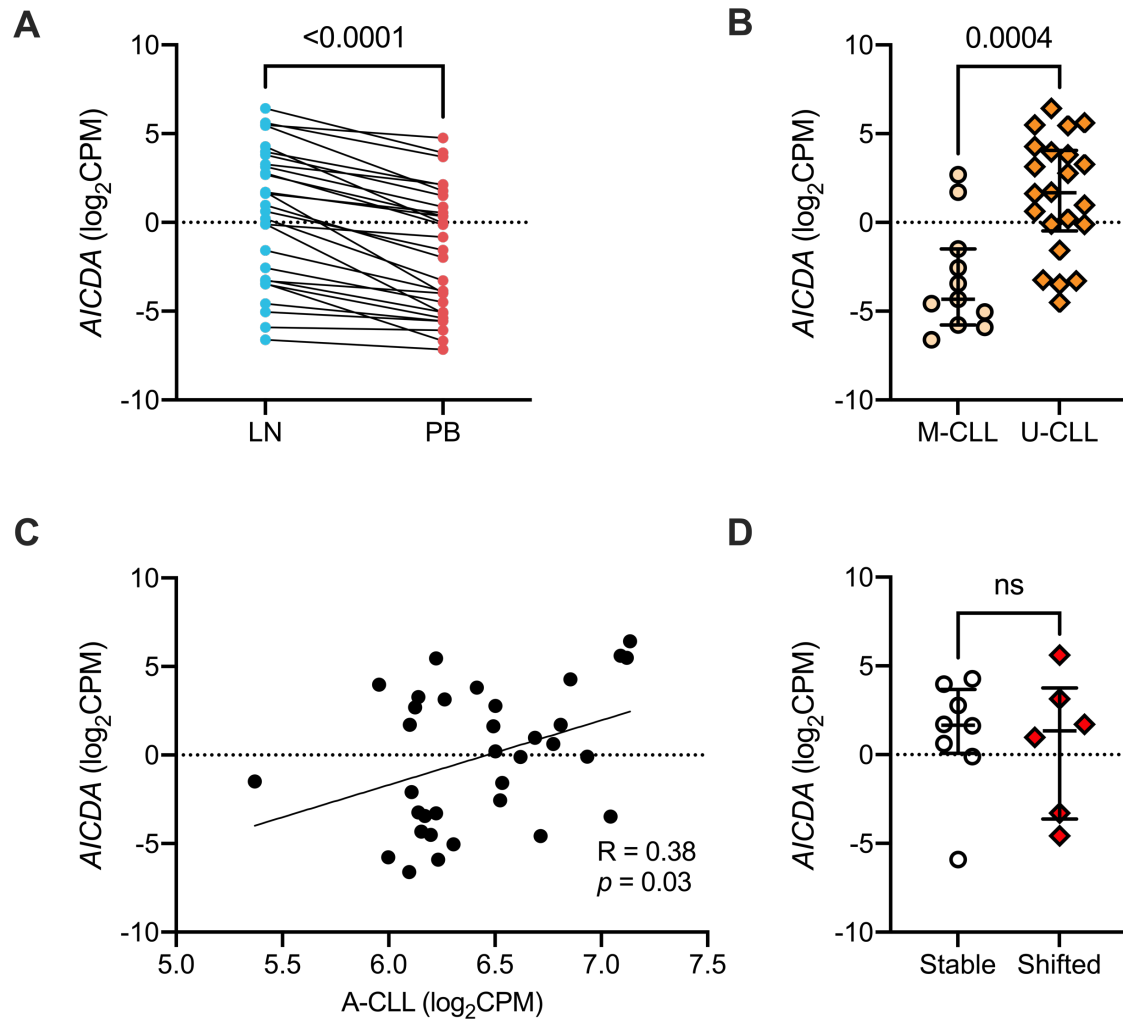

**Supplemental Figure S6. *AICDA* gene expression in purified CD19<sup>+</sup> tumor cells.**

(A) *AICDA* expression in paired LN and PB samples. Dot plot, median and interquartile range of *AICDA* expression in LN samples in (B) M-CLL and U-CLL cases, and (D) stable and shifted groups. (C) Correlation of *AICDA* expression and A-CLL signature in LN samples.

## Supplemental References

1. Dobin A, Davis CA, Schlesinger F, et al. STAR: ultrafast universal RNA-seq aligner. *Bioinformatics*. 2013;29(1):15-21.
2. Liao Y, Smyth GK, Shi W. featureCounts: an efficient general purpose program for assigning sequence reads to genomic features. *Bioinformatics*. 2014;30(7):923-930.
3. Law CW, Chen Y, Shi W, Smyth GK. voom: Precision weights unlock linear model analysis tools for RNA-seq read counts. *Genome Biol*. 2014;15(2):R29.
4. Subramanian A, Tamayo P, Mootha VK, et al. Gene set enrichment analysis: a knowledge-based approach for interpreting genome-wide expression profiles. *Proc Natl Acad Sci U S A*. 2005;102(43):15545-15550.
5. Yu G, Wang LG, Han Y, He QY. clusterProfiler: an R package for comparing biological themes among gene clusters. *OMICS*. 2012;16(5):284-287.
6. Newman AM, Liu CL, Green MR, et al. Robust enumeration of cell subsets from tissue expression profiles. *Nat Methods*. 2015;12(5):453-457.
7. Herishanu Y, Perez-Galan P, Liu D, et al. The lymph node microenvironment promotes B-cell receptor signaling, NF-kappaB activation, and tumor proliferation in chronic lymphocytic leukemia. *Blood*. 2011;117(2):563-574.
8. Zheng GX, Terry JM, Belgrader P, et al. Massively parallel digital transcriptional profiling of single cells. *Nat Commun*. 2017;8:14049.
9. Stuart T, Butler A, Hoffman P, et al. Comprehensive Integration of Single-Cell Data. *Cell*. 2019;177(7):1888-1902 e1821.
10. Chen YC, Suresh A, Underbayev C, et al. IKAP-Identifying K mAjor cell Population groups in single-cell RNA-sequencing analysis. *Gigascience*. 2019;8(10).
11. La Manno G, Soldatov R, Zeisel A, et al. RNA velocity of single cells. *Nature*. 2018;560(7719):494-498.
12. Bergen V, Lange M, Peidli S, Wolf FA, Theis FJ. Generalizing RNA velocity to transient cell states through dynamical modeling. *Nat Biotechnol*. 2020;38(12):1408-1414.
13. Cibulskis K, Lawrence MS, Carter SL, et al. Sensitive detection of somatic point mutations in impure and heterogeneous cancer samples. *Nat Biotechnol*. 2013;31(3):213-219.

14. Cibulskis K, McKenna A, Fennell T, Banks E, DePristo M, Getz G. ContEst: estimating cross-contamination of human samples in next-generation sequencing data. *Bioinformatics*. 2011;27(18):2601-2602.
15. Taylor-Weiner A, Stewart C, Giordano T, et al. DeTiN: overcoming tumor-in-normal contamination. *Nat Methods*. 2018;15(7):531-534.
16. Li H, Handsaker B, Wysoker A, et al. The Sequence Alignment/Map format and SAMtools. *Bioinformatics*. 2009;25(16):2078-2079.
17. Olshen AB, Venkatraman ES, Lucito R, Wigler M. Circular binary segmentation for the analysis of array-based DNA copy number data. *Biostatistics*. 2004;5(4):557-572.
18. Ramos AH, Lichtenstein L, Gupta M, et al. Oncotator: cancer variant annotation tool. *Hum Mutat*. 2015;36(4):E2423-2429.
19. Carter SL, Cibulskis K, Helman E, et al. Absolute quantification of somatic DNA alterations in human cancer. *Nat Biotechnol*. 2012;30(5):413-421.
20. Escobar MD, West M. Bayesian Density-Estimation and Inference Using Mixtures. *Journal of the American Statistical Association*. 1995;90(430):577-588.
21. Landau DA, Carter SL, Stojanov P, et al. Evolution and impact of subclonal mutations in chronic lymphocytic leukemia. *Cell*. 2013;152(4):714-726.
